# Supplementary material
Source: PubMed Central journal article supplement (PMC3197868)

Supplemental Figure 1

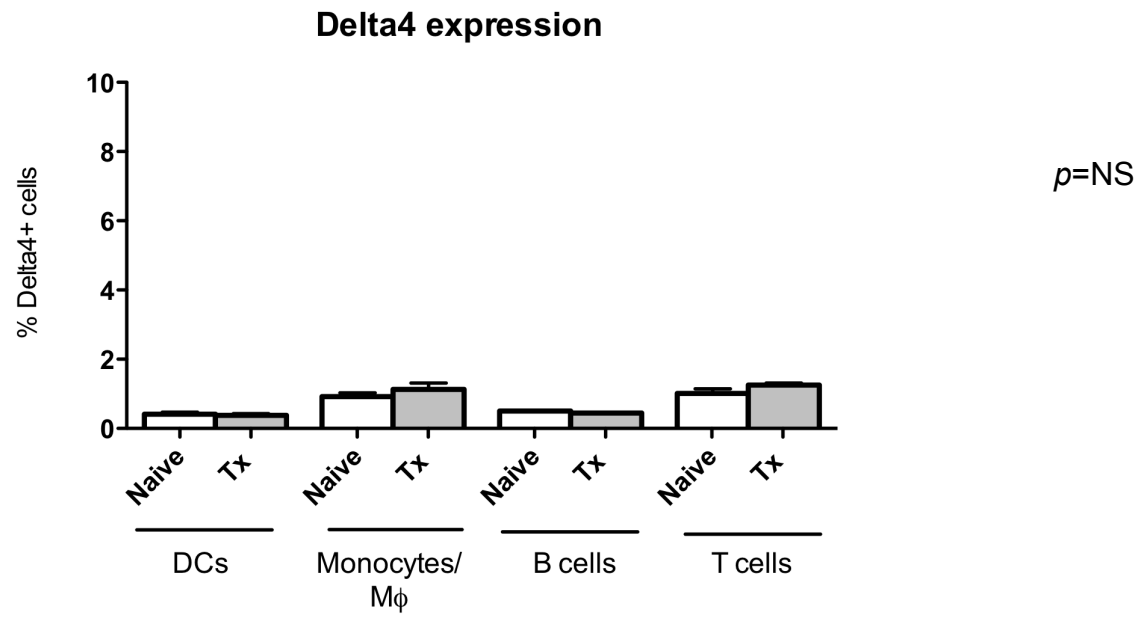

Supplement: NIHMS321338-supplement-2.pdf [file NIHMS321338-supplement-2.pdf]

### Supplemental Figure 3

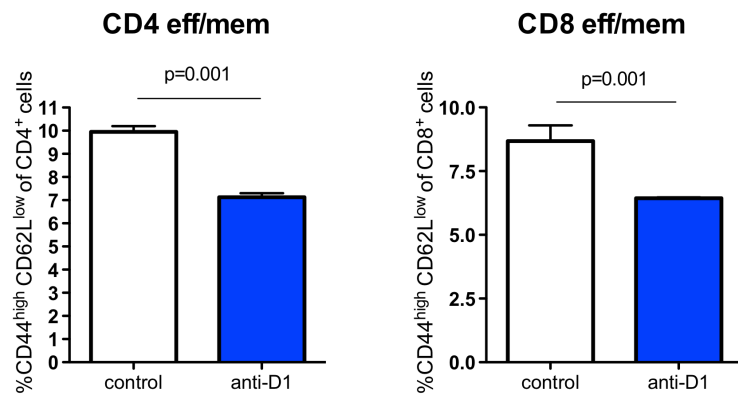

Supplement: NIHMS321338-supplement-4.pdf [file NIHMS321338-supplement-4.pdf]

Supplemental Figure 4.

□ sCTLA4-Ig  
 ■ sCTLA4-Ig + Anti-Delta1

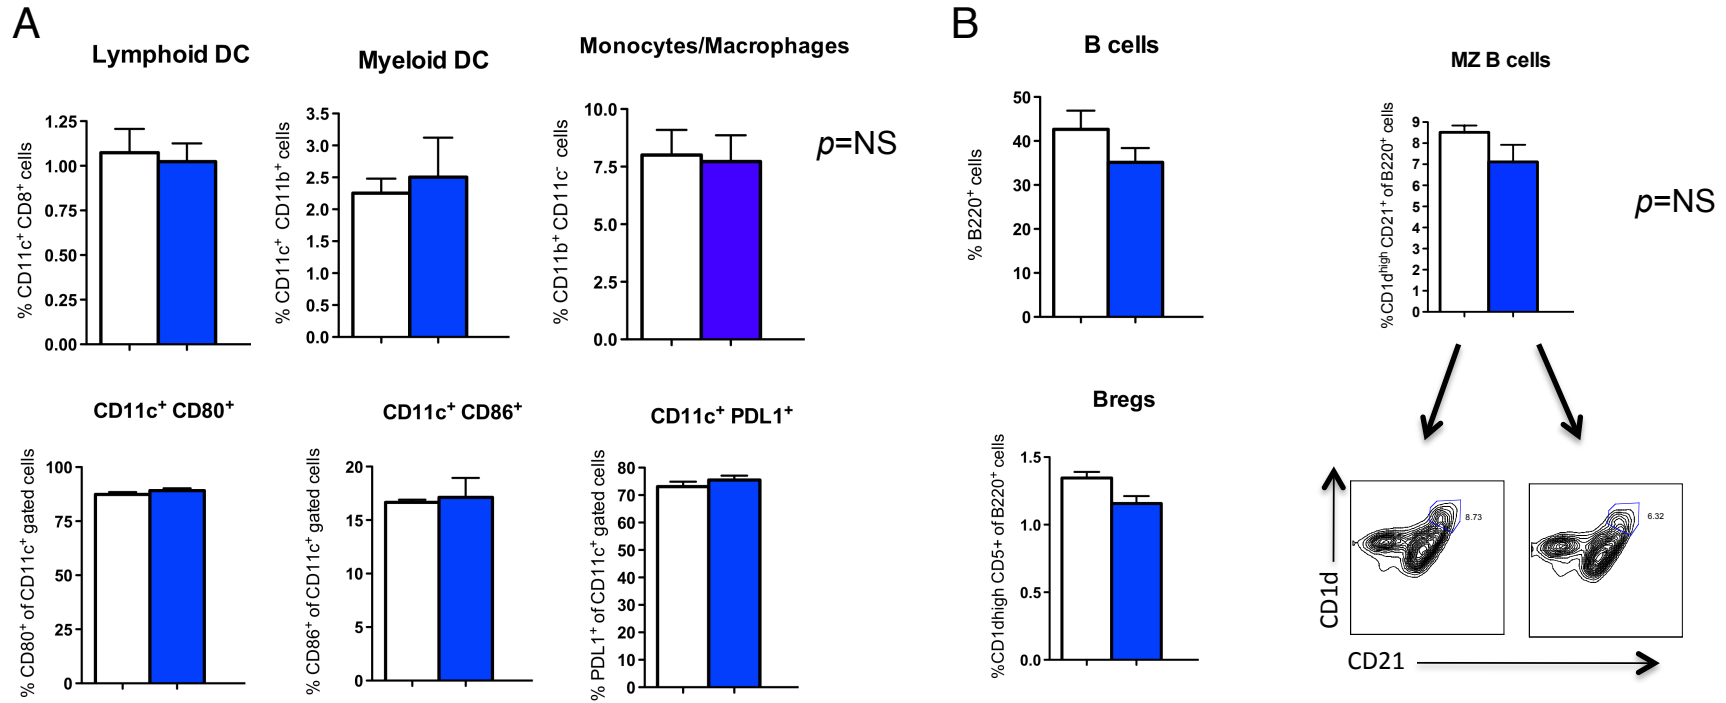

Supplement: NIHMS321338-supplement-5.pdf [file NIHMS321338-supplement-5.pdf]
